# Supplementary material for: Enhancement of electrical performance of atomic layer deposited SnO films via substrate surface engineering
Source: Royal Society of Chemistry journal article supplement (doi:10.1039/d1tc02703d), 2021-01-01
Supplement: d1tc02703d1.pdf [file d1tc02703d1.pdf]

# Supporting Information

## **Enhancement of Electrical Performance of Atomic Layer Deposited SnO Films via Substrate Surface Engineering**

*In-Hwan Baek,<sup>a,b</sup> Ah-Jin Cho,<sup>a</sup> Ga Yeon Lee,<sup>c</sup> Heenang Choi,<sup>c</sup> Sung Ok Won,<sup>d</sup> Taeyong Eom,<sup>c</sup> Taek-Mo Chung,<sup>c</sup> Cheol Seong Hwang,<sup>b</sup> and Seong Keun Kim<sup>a,e,\*</sup>*

<sup>a</sup>Electronic Materials Research Center, Korea Institute of Science and Technology, Seoul, 02792, South Korea

<sup>b</sup>Department of Materials Science and Engineering and Inter-University Semiconductor Research Center, Seoul National University, Seoul, 08826, South Korea

<sup>c</sup>Division of Advanced Materials, Korea Research Institute of Chemical Technology, Daejeon, 34114, South Korea

<sup>d</sup>Advanced Analysis Center, Korea Institute of Science and Technology, Seoul 02792, Korea

<sup>e</sup>KU-KIST Graduate School of Converging Science and Technology, Korea University, Seoul 02841, South Korea

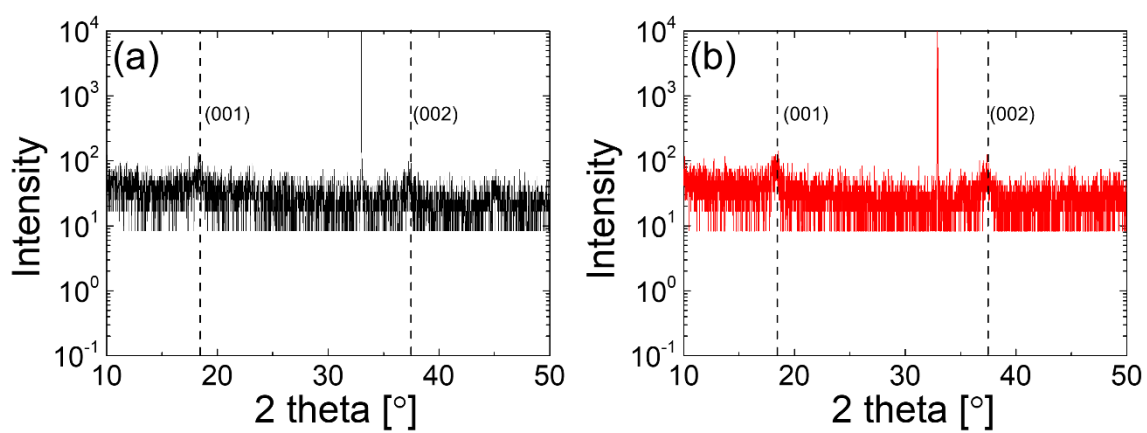

**Figure S1.** XRD patterns of the SnO films deposited on (a) the as-cleaned SiO<sub>2</sub> and (b) the plasma-treated SiO<sub>2</sub>.

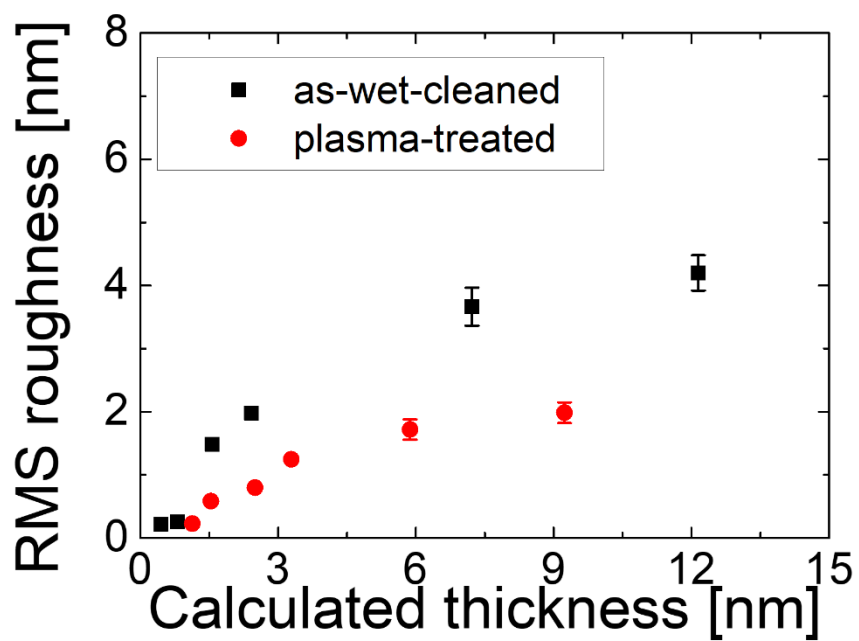

**Figure S2.** Variation in the RMS roughness of the SnO films grown on the as-wet-cleaned and plasma-treated SiO<sub>2</sub> substrates as a function of the film thickness.

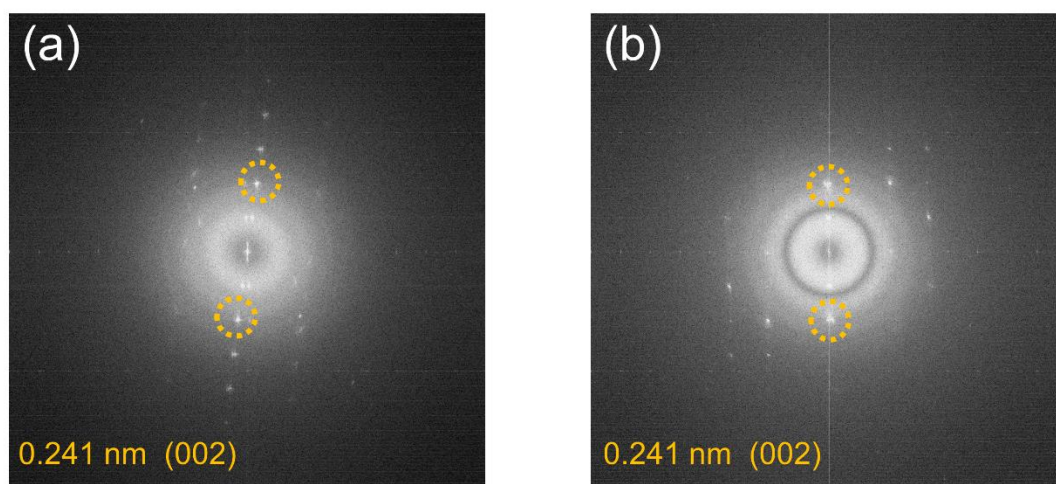

**Figure S3.** The fast Fourier transform images corresponding to the HRTEM images in (a) Fig. 4(a) and (b) Fig. 4(b).

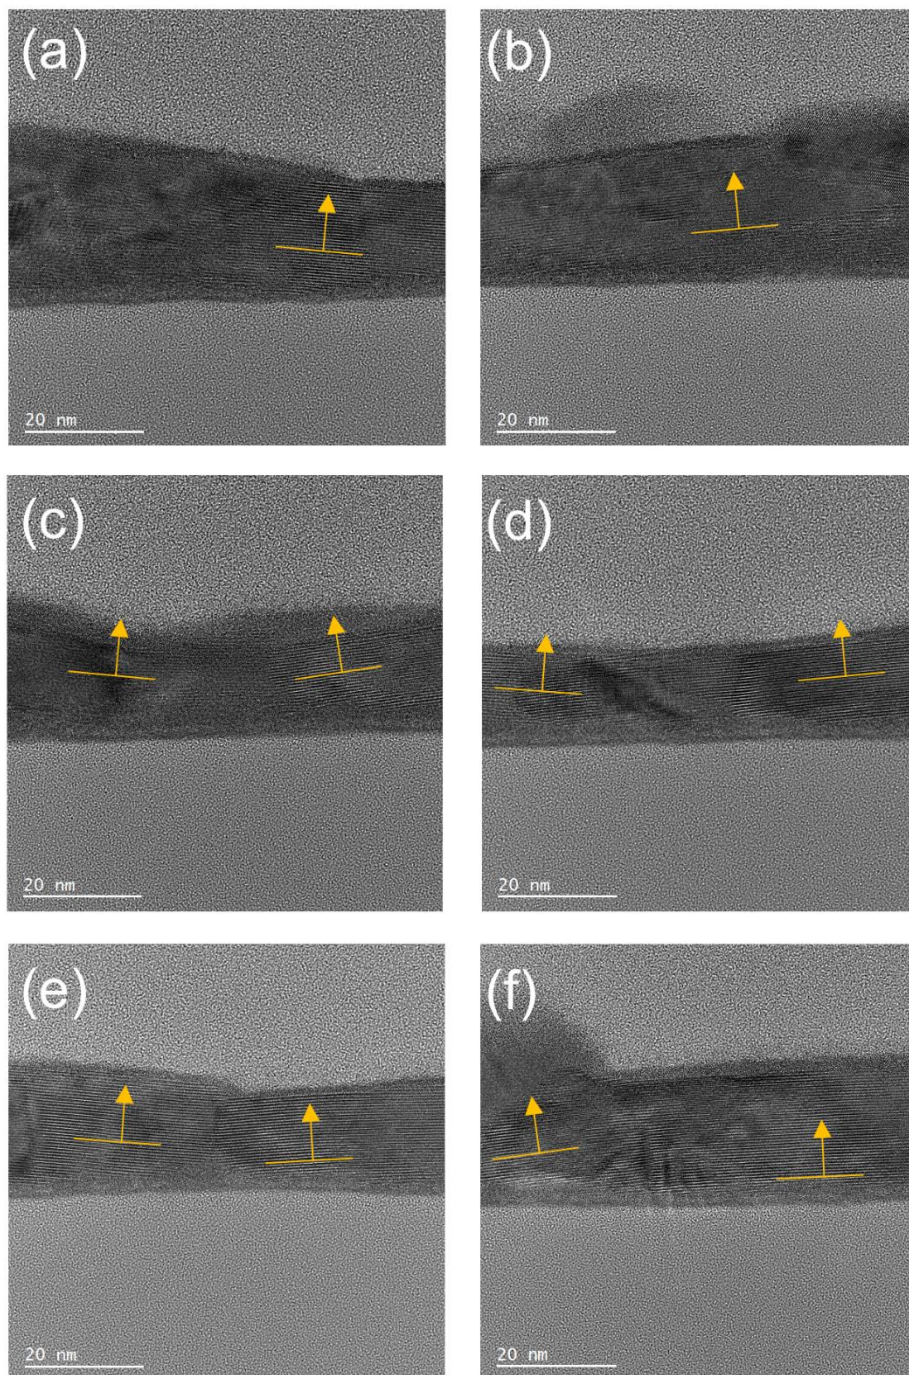

**Figure S4.** (a)-(f) HRTEM images obtained from multiple regions in the SnO film grown on the as-cleaned SiO<sub>2</sub>.

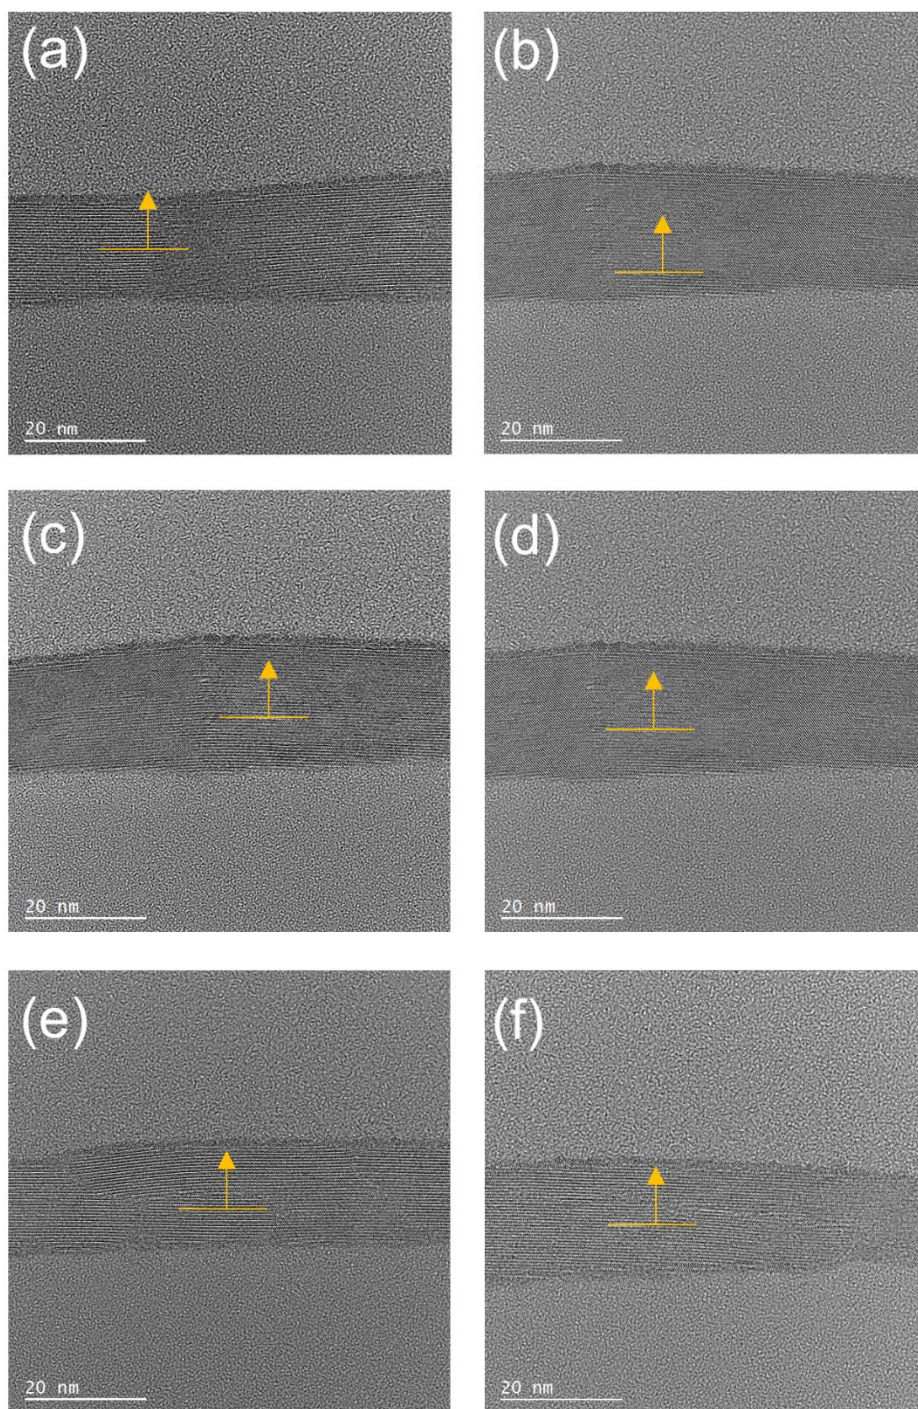

**Figure S5.** (a)-(f) HRTEM images obtained from multiple regions in the SnO film grown on the plasma-treated SiO<sub>2</sub>.

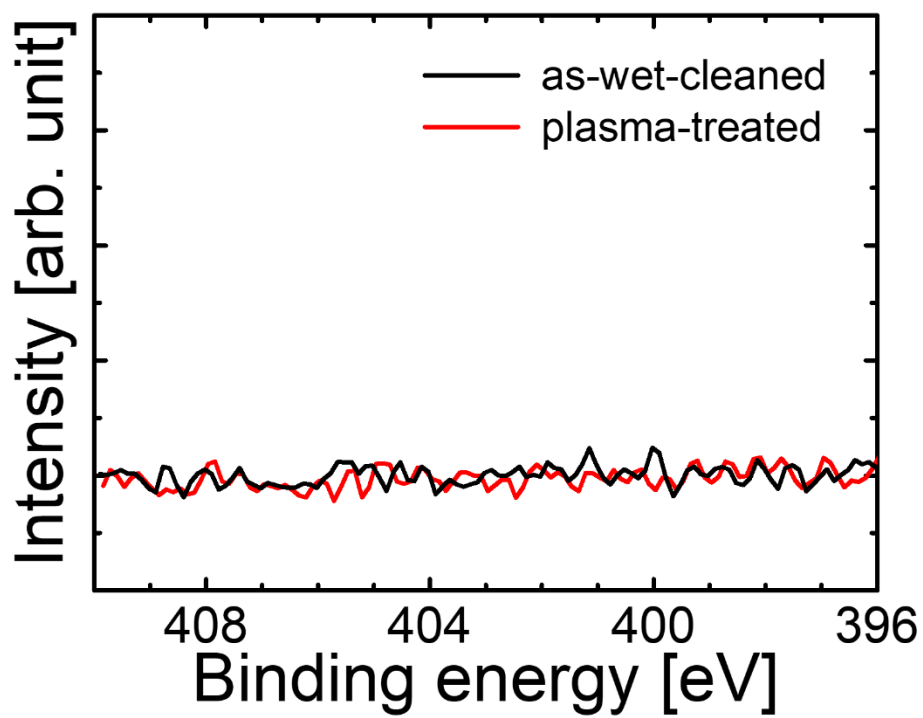

**Figure S6.** XPS spectra of N 1s core level of the as-wet-cleaned, and plasma-treated SiO<sub>2</sub>.

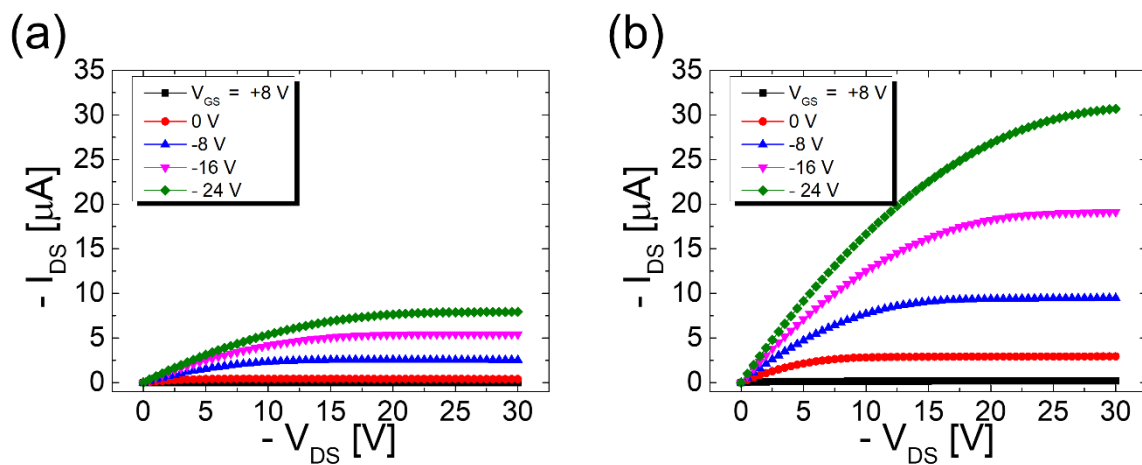

**Figure S7.** Output curves of the bottom gate-structured TFTs fabricated with the SnO grown on (a) the as-wet-cleaned  $\text{SiO}_2$  and (b) plasma-treated  $\text{SiO}_2$ .
